# Supplementary material for: Phosphorylation of Msx1 promotes cell proliferation through the Fgf9/18-MAPK signaling pathway during embryonic limb development
Source: PubMed Central journal article supplement — Nucleic Acids Res. 2020 Oct 20;48(20):11452–67. doi: 10.1093/nar/gkaa905 (PMC7672426; doi:10.1093/nar/gkaa905), 2020-10-20
Supplement: gkaa905_supplemental_file.pdf [file gkaa905_supplemental_file.pdf]

## Supplementary Data

### SUPPLEMENTARY TABLES

**Table S1. Primers used for Msx1 point mutation assays**

| Primer name | Primer sequence (5' to 3')                                                                          |
|-------------|-----------------------------------------------------------------------------------------------------|
| Msx1(S136A) | F: AAGGCCGAAGCCCCGAGAA<br>R: TTCTCGGGGGCTTCGGCCTT                                                   |
| Msx1(S136D) | F: AAGGCCGAAGACCCCCGAGAA<br>R: TTCTCGGGGTCTTCGGCCTT                                                 |
| Msx1(S152A) | F: TGGATGCAGAGTCCCCGCTTCGCCCCGCCCCAGCCAGACGGCTG<br>R: CAGCCGTCTGGCTGGGGGCGGGGCGAAGCGGGGACTCTGCATCCA |
| Msx1(S160A) | F: CCGCCCCAGCCAGACGGCTGGCTCCCCAGCATGCACCCTACGC<br>R: GCGTAGGGTGCATGCTGGGGGAGCCAGCCGTCTGGCTGGGGGCGG  |

**Table S2: List of antibodies used in this study.**

| Antigen           | Antibody Source<br>(Catalog# and/or clone#) | Type             | Use and dilution |        |
|-------------------|---------------------------------------------|------------------|------------------|--------|
|                   |                                             |                  | IF               | WB     |
| $\beta$ -Actin    | Proteintech (23660-1-AP)                    | Rabbit mAb       |                  | 1:5000 |
| p-Erk1/2          | CST (4370S)                                 | Rabbit mAb       |                  | 1:2000 |
| t-Erk1/2          | CST (9102S)                                 | Rabbit mAb       |                  | 1:1000 |
| Fgf9              | Bioss(bs-5906R)                             | Rabbit pAb       |                  | 1:500  |
| Fgf18             | Bioss(bs-9762R)                             | Rabbit pAb       |                  | 1:500  |
| Flag              | Sigma (F3165, Clone M2)                     | Mouse mAb        | 1:5000           | 1:5000 |
| PCNA              | Abcam (ab18197)                             | Rabbit pAb       | 1:200            | 1:500  |
| Ki-67             | Abcam (ab16667)                             | Rabbit mAb       | 1:200            | 1:1000 |
| SOX9              | Abcam (ab76997)                             | Mouse mAb        | 1:200            |        |
| $\alpha$ -Tubulin | Proteintech (11224-1-AP)                    | Rabbit pAb       |                  | 1:5000 |
| Alexa Fluor 488   | Invitrogen (A32723)                         | Goat anti-Mouse  | 1:500            |        |
| Alexa Fluor 488   | Invitrogen (A32731)                         | Goat anti-Rabbit | 1:500            |        |
| Alexa Fluor 546   | Invitrogen (A21133)                         | Goat anti-Mouse  | 1:500            |        |
| Alexa Fluor 647   | Invitrogen (A32733)                         | Goat anti-Rabbit | 1:500            |        |

**Table S3. guideRNA information**

| Target gene | Sequence                                                                                                                            |
|-------------|-------------------------------------------------------------------------------------------------------------------------------------|
| <i>Msx1</i> | F:<br>CGCTCTTCGCCGCGGGGCCAAGGAGAGCGTCCGTTTTAG<br>AGCTAGAAATAGCAA<br>R:<br>CGCTCTTCTAACCAAGTGCTGCACCGAGCCACCCGGTGT<br>TTCGTCCTTTCCAC |

**Table S4. Primers used for qRT-PCR analysis**

| Gene name     | Primer sequence (5' to 3')                             |
|---------------|--------------------------------------------------------|
| <i>Fgf3</i>   | F: TGCCTACCAAGTACCACC<br>R: CACTTCCACCGCAGTAATCTC      |
| <i>Fgf9</i>   | F: ATGGCTCCCTTAGGTGAAGTT<br>R: TCCGCCTGAGAATCCCCTTT    |
| <i>Fgf14</i>  | F: TTCTCAGGGTGTCTAAGCTGC<br>R: GGGGATCAGTTGGGTTCTTGTT  |
| <i>Fgf15</i>  | F: ATGGCGAGAAAGTGGAAACGG<br>R: CTGACACAGACTGGGATTGCT   |
| <i>Fgf18</i>  | F: CCTGCACTTGCTGTGTTTAC<br>R: TGCTTCCGACTCACATCATCT    |
| <i>Fgfr1</i>  | F: TTTTAAAGCTAAGTAGCTGG<br>R: AATTGGCTAGACCTTGGCAG     |
| <i>Fgfbp1</i> | F: TGGCTACTCAGGCGTTCTCA<br>R: CGTCAGAGATTAGATGTCCTGC   |
| <i>Ki67</i>   | F: ACCGTGGAGTAGTTTATCTGGG<br>R: TGTTTCCAGTCCGCTTACTTCT |
| <i>Msx1</i>   | F: CTCTCGGCCATTTCTCAGTC<br>R: TACTGCTTCTGGCGGAACTT     |
| <i>GAPDH</i>  | F: TCGCACTCAACAGCAACTC<br>R: GCCTCTCTTGCTCAGTGTC       |

**Table S5. Primers used for CHIP-qPCR**

| Gene name      | Primer sequence (5' to 3')                            |
|----------------|-------------------------------------------------------|
| <i>Fgf9</i>    | F: AGCTCTGAGGTGTACGAACTTG<br>R: ACCCATCACCCCATTGCTAAC |
| <i>Fgf18-1</i> | F: CCCTGTGTAACACCCCGATAAC<br>R: AGGCTGAAGTGGAAACAGGGA |
| <i>Fgf18-2</i> | F: CCAAGACCTTCCCAGTCTG<br>R: AGAGTTCTCCCCATCCTGCT     |
| <i>Fgf18-3</i> | F: ACTGTCGGCAATGGGACTG<br>R: CACCAGGTCCAGCTTCGTG      |

**Table S6. The sequences of RNAs oligo**

| siRNA            | siRNA sequence (5' to 3')                                        |
|------------------|------------------------------------------------------------------|
| Fgf9             | Sense: GCACCAGAAAUUUACACAUTT<br>Antisense: AUGUGUAAAUUUCUGGUGCTT |
| Fgf18            | Sense: GUGGGAAGCACAUUCAAGUTT<br>Antisense: ACUUGAAUGUGCUUCCCACTT |
| Negative control | Sense: UUCUCCGAACGUGUCACGUTT<br>Antisense: ACGUGACACGUUCGGAGAATT |

**Table S7. Kinase of phosphorylation sites of Msx1 predicted online**

| Location | Phosphorylated sites | HMM Bit score | E-value | Catalytic kinase |
|----------|----------------------|---------------|---------|------------------|
| 136      | VKAESPEKL            | -3.1          | 21      | CDK1             |
| 152      | SPRFSPPPA            | -2.4          | 16      | CDK1             |
| 152      | SPRFSPPPA            | -3.8          | 19      | ATM              |
| 160      | ARRLSPPAC            | 5.5           | 0.24    | PKA              |
| 160      | ARRLSPPAC            | -1.5          | 12      | IKK              |

## SUPPLEMENTARY FIGURES

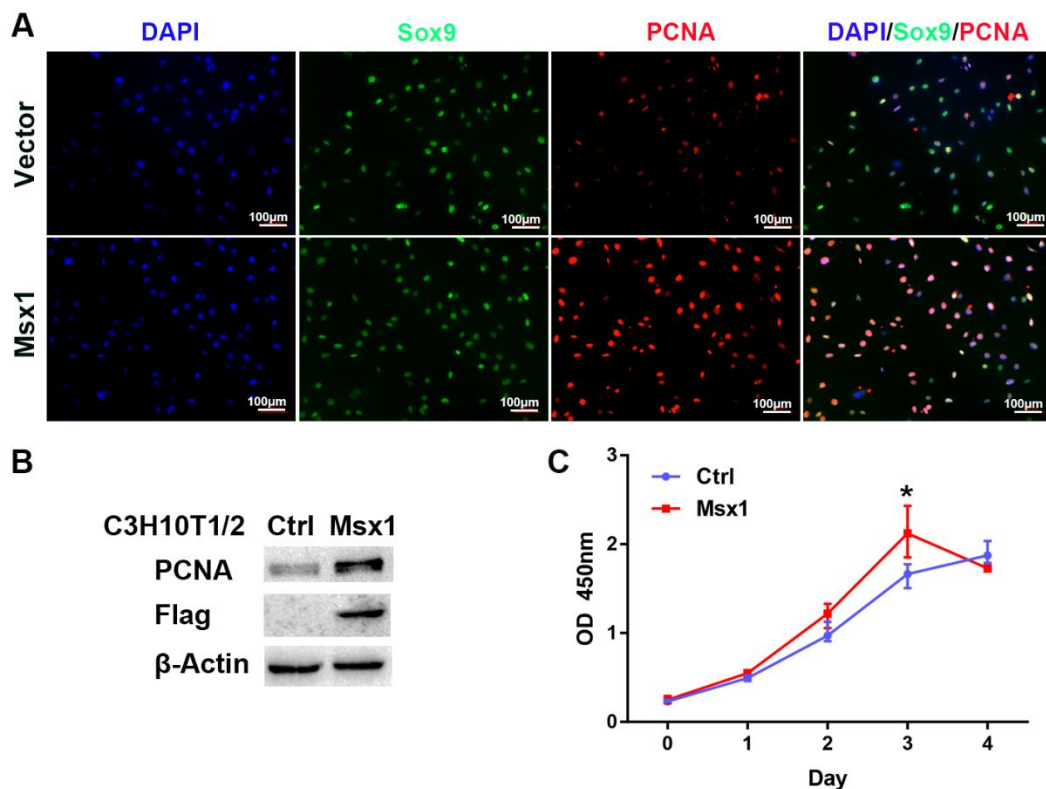

Figure S1. Overexpression of Msx1 promotes C3H10T1/2 cell proliferation. (A) IF assays to detect PCNA expression in C3H10T1/2 cells overexpressing Msx1 and the control. DAPI was used to counterstain the nuclei. Scale bar = 100  $\mu$ m. (B) Western blotting to detect PCNA expression in C3H10T1/2 cells overexpressing Msx1 and the control. (C) CCK-8 assays to assess the proliferation rate of C3H10T1/2 cells

overexpressing Msx1 and the control.

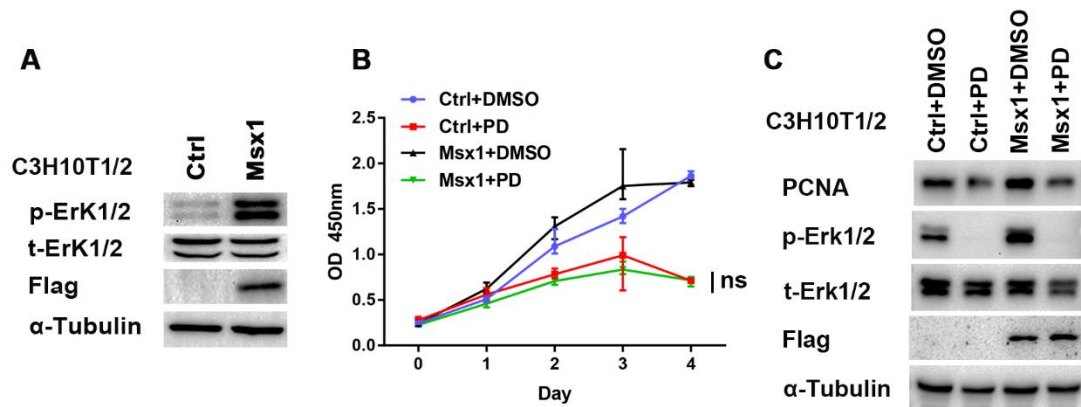

Figure S2. Msx1 promotes C3H10T1/2 cell proliferation by activating the MAPK signaling pathway. (A) Western blotting assays to detect the level of p-Erk1/2 in Msx1-overexpressing C3H10T1/2 cells and the control. (B) CCK-8 assays to assess the impact of PD0325901 on C3H10T1/2 cell proliferation promoted by Msx1. C3H10T1/2 cells overexpressing Msx1 or the control were treated with 1 $\mu$ M PD0325901 or DMSO, respectively. (C) Western blotting assays to detect the impact of PD0325901 on the expression of proliferation marker promoted by Msx1 in C3H10T1/2 cells.

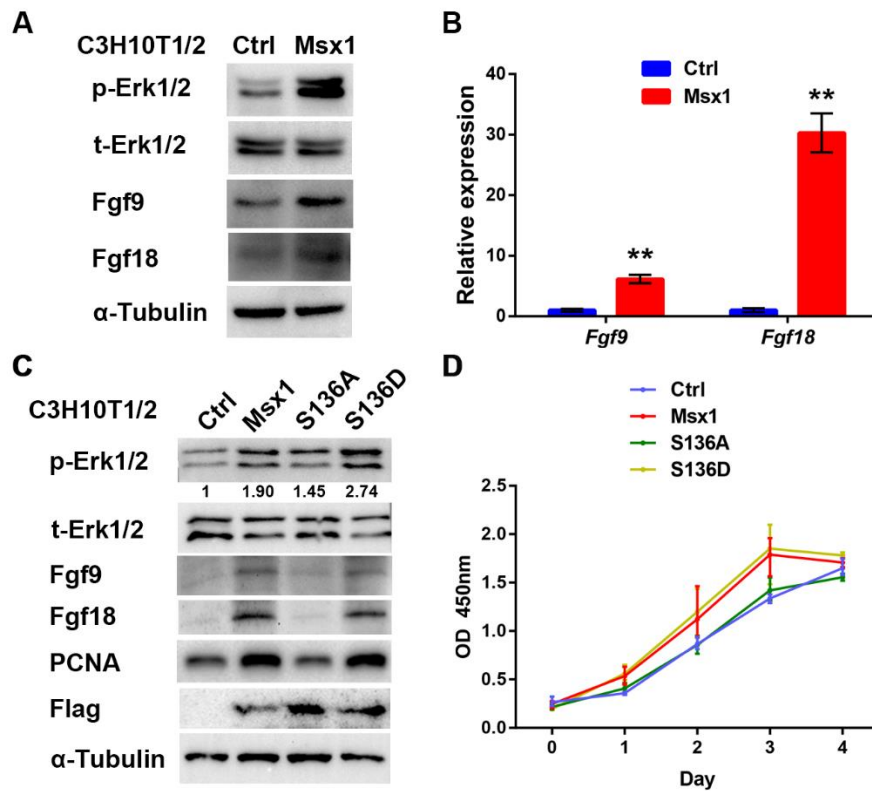

Figure S3. Msx1 up-regulated Fgf9 and Fgf18 expression by the phosphorylation of 136S in C3H10T1/2 cells. (A) Western blotting to confirm upregulation of Fgf9 and

Fgf18 by *Msx1* in C3H10T1/2 cells. (B) qRT-PCR assays to determine the mRNA level of *Fgf9* and *Fgf18* in C3H10T1/2 cells overexpressing *Msx1* and the control. Values are the means  $\pm$  SD.  $**P < 0.001$ . (C) Western blotting to assess the effect of *Msx1* phosphorylation site Ser136 on the levels of p-Erk1/2, PCNA, Fgf9 and Fgf18 in C3H10T1/2 cells. Numbers under western blot bands represent relative quantifications over t-Erk1/2. (D) CCK-8 assays to examine the effect of *Msx1* Ser136 phosphorylation on the proliferation of C3H10T1/2 cells.

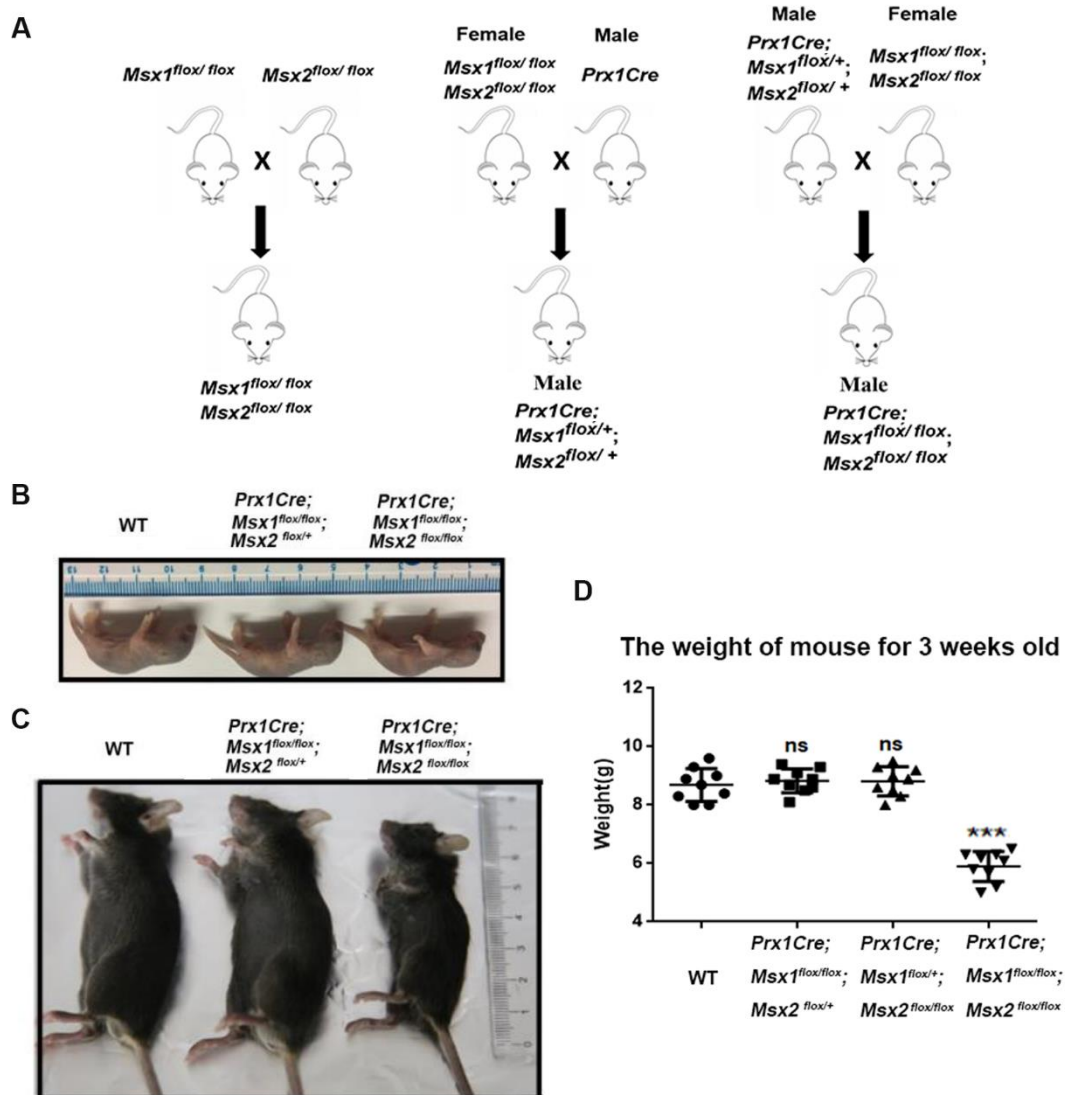

Figure S4. General appearance of mice with *Msx* inactivated in the lateral plate mesoderm. (A) Strategies for obtaining different genotype mice by crossing *Msx*<sup>flox/flox</sup> mice with *Prx1-Cre* mice. (B and C) Representative view of male control (wild-type), *Prx1-Cre*; *Msx1*<sup>flox/flox</sup>; *Msx2*<sup>flox/+</sup>, *Prx1-Cre*; *Msx1*<sup>flox/flox</sup>; *Msx2*<sup>flox/flox</sup> mice at 2 days (B) or 6 weeks (C) after birth. (D) Body weight statistical analysis of male control (wild-type), *Prx1-Cre*; *Msx1*<sup>flox/flox</sup>; *Msx2*<sup>flox/+</sup>, *Prx1-Cre*; *Msx1*<sup>flox/+</sup>; *Msx2*<sup>flox/flox</sup>, *Prx1-Cre*; *Msx1*<sup>flox/flox</sup>; *Msx2*<sup>flox/flox</sup> mice measured at 3 weeks old (n=9). Values are the means  $\pm$  SD.  $***P < 0.0001$ .
